# Supplementary material for: Prediction of the n-Octanol/Water Partition Coefficients of Basic Compounds Using Multi-Parameter QSRR Models Based on IS-RPLC Retention Behavior in a Wide pH Range
Source: MDPI journal article supplement (doi:10.3390/molecules28052270), 2023-02-28
Supplement: s1 [file s1]

# Supporting Information

## Prediction of *n*-Octanol/Water Partition Coefficients of Basic Compounds by Multi-parameter QSRR Models Based on IS-RPLC Retention Behaviour in Wide pH

Jun-Qin Qiao <sup>1</sup>, Xiao-Lan Liu <sup>1,2</sup>, Chao Liang <sup>1,3</sup>, Ju Wang <sup>1</sup>, Hong-Zhen Lian <sup>1,\*</sup> and Li Mao <sup>4,\*</sup>

<sup>1</sup> State Key Laboratory of Analytical Chemistry for Life Science, School of Chemistry & Chemical Engineering and Center of Materials Analysis, Nanjing University, Nanjing 210023, China;

<sup>2</sup> Taizhou Medical High-Tech Industrial Zone Public Platform Service Center, Taizhou 225300, China;

<sup>3</sup> Nanjing Zhulu Pharmaceutical Technology Co., Ltd., Nanjing 211500, China

<sup>4</sup> Ministry of Education (MOE) Key Laboratory of Modern Toxicology, School of Public Health, Nanjing Medical University, Nanjing 211166, China

\* Correspondence: hzlian@nju.edu.cn (H.-Z.L.); maoli@njmu.edu.cn (L.M.)

### Theoretical basis

Studies have shown that  $\log k_w$  could well describe the lipophilic index of compounds. The  $\log k_w$  is usually obtained by linear solvent strength (LSS) model [24].

$$\log k = \log k_w - S\varphi \quad (S1)$$

Where,  $k$  is the capacity factor,  $\varphi$  is the volume fraction of organic modifier in the mobile phase, and  $S$  is the constant obtained by linear regression in the equations.

Both theory and experiments prove that there is a good linear relationship between  $\log P$  and  $\log k_w$ , which is usually called Collander equation [25].

$$\log P = m \log k_w + n \quad (S2)$$

Where,  $m$  and  $n$  are constants obtained by linear regression.

The Eqs. (S1) and (S2) are the basis for the determination of  $\log P$  by reversed-phase liquid chromatography (RPLC) method. For dissociative solutes, it has been confirmed by many studies that the  $\log D$  calibrated from  $\log P$  has a better linear correlation with  $\log k_w$  than  $\log P$ . For basic compounds, the  $\log D$  value can be calibrated from Eq. (S3), and the Collander equation can be rewritten into Eq. (S4).

$$\log D = \log \left( \frac{P}{1 + 10^{(pK_{a_n} - pH)} + \dots + 10^{(pK_{a_n} - pH) + (pK_{a_{n-1}} - pH) + \dots + (pK_{a_1} - pH)}} \right) \quad (S3)$$

$$\log D = m' \log k_w + n' \quad (S4)$$

Where,  $pK_{a1}$ ,  $pK_{a2}$ , ...  $pK_{an}$  are the dissociation constants of basic compounds of corresponding acids in the mobile phase, pH is the pH value of mobile phase,  $m'$  and  $n'$  are fitting parameters. Han et al. [26] pointed out that although mobile phase pH and  $pK_a$  of solutes will change along with the varied organic modifier fraction, the difference between a couple of relevant pH and  $pK_a$  is a constant. Therefore, the used pH and  $pK_a$  in this paper were both the values obtained at 100% aqueous phase.

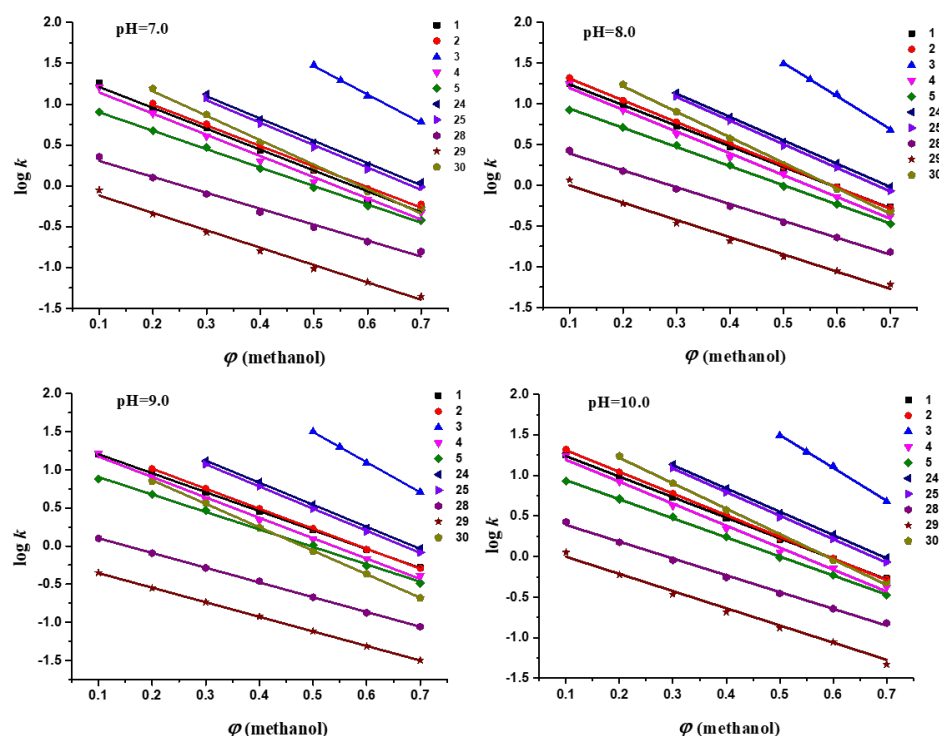

**Figure S1.** The linear plots of  $\log k$  versus  $\phi$  of some model compounds (1, 2, 3, 4, 5), verification compounds (24, 25) and sample compounds (28, 29, 30) at different mobile phases pH.  $\phi$  was the ratio of methanol in mobile phase. 1, 2, 3, 4, 5, 24, 25, 28, 29, 30 corresponded to the compounds listed in Table 1.

**Table S1.** Relationships of  $\log D - \log k_w$  derived from 13 model compounds at different mobile phase pH values.

| Buffer           | pH   | $\log D(y) - \log k_w(x)$ | N  | $R^2$  |
|------------------|------|---------------------------|----|--------|
| Phosphate buffer | 7.0  | $y = 0.973x - 0.107$      | 13 | 0.9383 |
|                  | 8.0  | $y = 0.956x - 0.077$      | 13 | 0.9735 |
|                  | 9.0  | $y = 0.997x - 0.172$      | 13 | 0.9759 |
|                  | 10.0 | $y = 1.007x - 0.240$      | 13 | 0.9722 |

**Table S2.**  $\log D - \log k_w$  models derived from 14 model compounds with different ion-suppressors and columns.

| Ion-suppressor | Column       | pH | $\log D(y) - \log k_w(x)$ | N  | $R^2$ |
|----------------|--------------|----|---------------------------|----|-------|
| This work      | TEA solution | 9  | $y = 0.892x - 0.042$      | 14 | 0.961 |

|           |                  |            |   |                  |    |       |
|-----------|------------------|------------|---|------------------|----|-------|
|           | Ammonia solution | C18        | 9 | $y=1.016x-0.309$ | 14 | 0.931 |
| Qi et al. | TEA solution     | Phenomenex | 9 | $y=1.003x-0.143$ | 14 | 0.936 |
| work      | Ammonia solution | Gemini C18 | 9 | $y=1.070x-0.285$ | 14 | 0.925 |

**Table S3.**  $\log D$ - $\log k_w$  models derived from 23 model compounds at different mobile phase pH values.

| Buffer           | pH   | $\log D$ - $\log k_w$                           | N  | $R^2$ |
|------------------|------|-------------------------------------------------|----|-------|
| Phosphate buffer | 7.0  | $\log D=(1.15\pm 0.10) \log k_w-(0.50\pm 0.16)$ | 23 | 0.857 |
|                  | 8.0  | $\log D=(1.00\pm 0.05) \log k_w-(0.21\pm 0.09)$ | 23 | 0.944 |
|                  | 9.0  | $\log D=(0.98\pm 0.04) \log k_w-(0.19\pm 0.07)$ | 23 | 0.967 |
|                  | 10.0 | $\log D=(0.98\pm 0.04) \log k_w-(0.23\pm 0.07)$ | 23 | 0.966 |

**Table S4.** Values of molecular structure parameters of  $n_e$ , A and B for all the investigated compounds.

| No. | Model compounds          | $n_e$  |        |        |         | A    | B    |
|-----|--------------------------|--------|--------|--------|---------|------|------|
|     |                          | pH 7.0 | pH 8.0 | pH 9.0 | pH 10.0 |      |      |
| 1   | 2-Methylaniline          | 0.00   | 0.00   | 0.00   | 0.00    | 0.92 | 0.97 |
| 2   | 4-Methylaniline          | 0.01   | 0.00   | 0.00   | 0.00    | 0.91 | 0.94 |
| 3   | N, N-Diethylaniline      | 0.07   | 0.01   | 0.00   | 0.00    | 0.80 | 0.95 |
| 4   | 4-Methylpyridine         | 0.07   | 0.01   | 0.00   | 0.00    | 0.82 | 0.63 |
| 5   | 4-Fluoroaniline          | 0.00   | 0.00   | 0.00   | 0.00    | 1.09 | 1.76 |
| 6   | 2,6-Dimethylpyridine     | 0.26   | 0.03   | 0.00   | 0.00    | 0.70 | 0.61 |
| 7   | 2,4,6-Trimethylpyridine  | 0.67   | 0.17   | 0.02   | 0.00    | 0.69 | 0.63 |
| 8   | N, N-Dimethylaniline     | 0.01   | 0.00   | 0.00   | 0.00    | 0.81 | 0.96 |
| 9   | Benzylamine              | 1.00   | 0.95   | 0.67   | 0.16    | 0.77 | 0.83 |
| 10  | 4-Ethoxyaniline          | 0.01   | 0.00   | 0.00   | 0.00    | 1.17 | 0.95 |
| 11  | 2-Methoxyaniline         | 0.00   | 0.00   | 0.00   | 0.00    | 1.00 | 0.99 |
| 12  | 4-Methoxyaniline         | 0.01   | 0.00   | 0.00   | 0.00    | 1.26 | 1.05 |
| 13  | 1,4-Benzenediamine       | 0.22   | 0.03   | 0.00   | 0.00    | 1.73 | 1.30 |
| 14  | Pyridine                 | 0.01   | 0.00   | 0.00   | 0.00    | 0.82 | 0.60 |
| 15  | N, N-Dimethylbenzylamine | 0.99   | 0.89   | 0.44   | 0.07    | 0.80 | 0.67 |
| 16  | 2-Amino-4-methylpyridine | 0.81   | 0.29   | 0.04   | 0.00    | 1.09 | 0.95 |
| 17  | 4-Isopropylaniline       | 0.01   | 0.00   | 0.00   | 0.00    | 0.87 | 0.92 |
| 18  | 2,4-Dimethylpyridine     | 0.27   | 0.04   | 0.00   | 0.00    | 0.76 | 0.63 |
| 19  | 2,4-Dimethylaniline      | 0.01   | 0.00   | 0.00   | 0.00    | 0.95 | 0.95 |
| 20  | 2-Amino-6-methylpyridine | 0.80   | 0.29   | 0.04   | 0.00    | 1.15 | 0.93 |
| 21  | Aniline                  | 0.00   | 0.00   | 0.00   | 0.00    | 1.08 | 1.86 |
| 22  | 4-Phenylpyridine         | 0.01   | 0.00   | 0.00   | 0.00    | 1.36 | 1.38 |
| 23  | 2-Picoline               | 0.06   | 0.01   | 0.00   | 0.00    | 0.75 | 0.60 |
| No. | Verification compounds   |        |        |        |         |      |      |
| 24  | Dibenzylamine            | 0.97   | 0.78   | 0.26   | 0.03    | 1.27 | 1.30 |
| 25  | 2-Ethylaniline           | 26.00  | 0.23   | 0.45   | 0.00    | 0.85 | 0.96 |
| 26  | 2-Ethylpyridine          | 12.90  | 0.00   | 0.59   | 0.00    | 0.71 | 0.61 |
| 27  | 4-Bromoaniline           | 26.00  | 0.31   | 0.30   | 0.00    | 1.19 | 1.19 |

| No. | Sample compounds                      |        |      |      |       |      |      |
|-----|---------------------------------------|--------|------|------|-------|------|------|
| 28  | 1,2-diaminobenzene                    | 52.00  | 0.24 | 0.73 | 1.00  | 1.40 | 1.26 |
| 29  | 1,3-diaminobenzene                    | 52.00  | 0.24 | 0.84 | 0.00  | 1.64 | 1.28 |
| 30  | 2-Methyl-4-nitroaniline               | 71.80  | 0.42 | 0.36 | 0.00  | 1.91 | 1.22 |
| 31  | 2,4-Dinitroaniline                    | 118.00 | 0.30 | 0.46 | 0.00  | 1.78 | 1.44 |
| 32  | 2-Chloro-4-nitroaniline               | 71.80  | 0.46 | 0.30 | 0.00  | 1.84 | 1.41 |
| 33  | 2-Chloro-4,6-dinitroaniline           | 118.00 | 0.23 | 0.57 | 0.00  | 2.09 | 1.56 |
| 34  | 1,1'-Carbonyldiimidazole              | 52.70  | 0.00 | 1.25 | -0.02 | 2.25 | 1.47 |
| 35  | Etiracetam                            | 63.40  | 0.49 | 1.32 | 0.00  | 1.87 | 1.03 |
| 36  | 2-Amino-4-methyl-6-methoxy-s-triazine | 73.90  | 0.23 | 0.98 | 0.00  | 1.26 | 1.07 |
| 37  | Citrazinic acid                       | 86.60  | 1.56 | 1.22 | 0.00  | 1.61 | 1.23 |
| 38  | 2-Amino-1,3,5-triazine                | 64.70  | 0.23 | 0.82 | -2.02 | 1.24 | 1.00 |
| 39  | 4-Iodoaniline                         | 26.00  | 0.31 | 0.30 | 0.00  | 1.28 | 1.53 |
| 40  | Imidazole                             | 28.70  | 0.42 | 0.78 | 0.00  | 0.85 | 0.71 |
| 41  | 4-Methylimidazole                     | 28.70  | 0.35 | 0.51 | 0.00  | 0.99 | 0.64 |
| 42  | 3,3'-Sulfonyldianiline                | 94.60  | 0.45 | 1.27 | 0.00  | 2.76 | 1.82 |

*n<sub>e</sub>*: obtained from <https://chemicalize.com/app/calculation>; A, B: obtained from UFZ-LSER database.
